# Supplementary material for: Genetic Diversity and Association Mapping of Grain-Size Traits in Rice Landraces from the Honghe Hani Rice Terraces System in Yunnan Province
Source: MDPI journal article supplement (doi:10.3390/plants12081678), 2023-04-17
Supplement: s1 [file s1]

**Table S2.** Correlation analysis among 5 grain-size traits of Hani terraces rice landraces under four environments, *indica* group (below diagonal) and *japonica* group (above diagonal).

|         | GL2013  | GL2014  | GL2015  | GL2021  | GW2013   | GW2014   | GW2015   | GW2021   | GT2013   | GT2014   | GT2015   | GT2021   | LWR2013  | LWR2014  | LWR2015 | LWR2021  | TGW2013 | TGW2014 | TGW2015 | TGW2021 |
|---------|---------|---------|---------|---------|----------|----------|----------|----------|----------|----------|----------|----------|----------|----------|---------|----------|---------|---------|---------|---------|
| GL2013  | 1.00    | 0.74**  | 0.78*** | 0.79*** | 0.23     | -0.04    | 0.09     | -0.04    | 0.09     | 0.27     | 0.42     | 0.13     | 0.44     | 0.51     | 0.63*   | 0.51*    | 0.13    | 0.59*   | 0.54*   | 0.36    |
| GL2014  | 0.71*** | 1.00    | 0.84*** | 0.87*** | -0.05    | -0.19    | 0.38     | -0.08    | -0.28    | 0.25     | 0.39     | 0.05     | 0.52*    | 0.70**   | 0.49    | 0.58*    | 0.23    | 0.56*   | 0.51*   | 0.28    |
| GL2015  | 0.60*** | 0.65*** | 1.00    | 0.86*** | -0.255   | -0.39    | 0.22     | -0.40    | -0.21    | 0.17     | 0.49     | -0.17    | 0.73**   | 0.77***  | 0.72**  | 0.77***  | -0.04   | 0.46    | 0.55*   | 0.15    |
| GL2021  | 0.73*** | 0.70*** | 0.57*** | 1.00    | -0.07    | -0.30    | 0.11     | -0.18    | -0.20    | 0.05     | 0.18     | -0.09    | 0.58*    | 0.68**   | 0.69**  | 0.73**   | 0.07    | 0.42    | 0.42    | 0.30    |
| GW2013  | 0.14    | -0.02   | -0.11   | 0.03    | 1.00     | 0.80***  | 0.31     | 0.79***  | 0.49     | 0.17     | -0.02    | 0.57*    | -0.77*** | -0.59*   | -0.45   | -0.58*   | 0.38    | 0.33    | 0.12    | 0.63*   |
| GW2014  | -0.04   | -0.08   | 0.00    | -0.09   | 0.52***  | 1.00     | 0.52*    | 0.75**   | 0.19     | 0.32     | -0.12    | 0.44     | -0.75**  | -0.79*** | -0.69** | -0.69**  | 0.27    | 0.32    | 0.16    | 0.46    |
| GW2015  | 0.06    | 0.03    | -0.02   | 0.11    | 0.43***  | 0.36***  | 1.00     | 0.46     | 0.02     | 0.46     | 0.17     | 0.40     | -0.26    | -0.18    | -0.52*  | -0.27    | 0.47    | 0.55*   | 0.33    | 0.49    |
| GW2021  | -0.04   | -0.12   | -0.13   | -0.03   | 0.60***  | 0.60***  | 0.38***  | 1.00     | 0.49     | 0.12     | -0.22    | 0.78***  | -0.76**  | -0.61*   | -0.67** | -0.80*** | 0.72**  | 0.36    | 0.18    | 0.63**  |
| GT2013  | 0.14    | -0.03   | 0.00    | 0.11    | 0.78***  | 0.53***  | 0.38***  | 0.37***  | 1.00     | 0.26     | 0.22     | 0.61*    | -0.42    | -0.28    | -0.24   | -0.49    | 0.39    | 0.03    | -0.10   | 0.28    |
| GT2014  | 0.03    | 0.02    | 0.06    | -0.03   | 0.34**   | 0.63***  | 0.35**   | 0.43***  | 0.46***  | 1.00     | 0.44     | 0.48     | 0.00     | -0.02    | -0.17   | -0.04    | 0.03    | 0.40    | 0.23    | 0.44    |
| GT2015  | 0.10    | 0.06    | 0.09    | 0.04    | 0.32**   | 0.32**   | 0.65***  | 0.32**   | 0.36**   | 0.37***  | 1.00     | 0.18     | 0.28     | 0.41     | 0.29    | 0.25     | -0.11   | 0.22    | 0.33    | -0.02   |
| GT2021  | -0.18   | -0.25*  | -0.10   | -0.11   | 0.24*    | 0.45***  | 0.30**   | 0.53***  | 0.34**   | 0.42***  | 0.23*    | 1.00     | -0.46    | -0.27    | -0.44   | -0.60*   | 0.70**  | 0.36    | 0.23    | 0.63*   |
| LWR2013 | 0.43*** | 0.45*** | 0.40*** | 0.40*** | -0.72*** | -0.52*** | -0.27**  | -0.43*** | -0.64*** | -0.34**  | -0.19    | -0.35**  | 1.00     | 0.87***  | 0.85*** | 0.88***  | -0.29   | 0.06    | 0.25    | -0.38   |
| LWR2014 | 0.52*** | 0.72*** | 0.47*** | 0.55*** | -0.34**  | -0.64*** | -0.21    | -0.45*** | -0.34**  | -0.39*** | -0.12    | -0.46*** | 0.66***  | 1.00     | 0.81*** | 0.83***  | -0.08   | 0.09    | 0.23    | -0.27   |
| LWR2015 | 0.38*** | 0.45*** | 0.71*** | 0.34**  | -0.40*** | -0.34**  | -0.67*** | -0.41*** | -0.29**  | -0.25*   | -0.39*** | -0.29**  | 0.52***  | 0.56***  | 1.00    | 0.88***  | -0.36   | 0.03    | 0.26    | -0.25   |
| LWR2021 | 0.50*** | 0.57*** | 0.46*** | 0.68*** | -0.38*** | -0.51*** | -0.20    | -0.74*** | -0.20    | -0.37*** | -0.14    | -0.48*** | 0.58***  | 0.73***  | 0.53*** | 1.00     | -0.45   | 0.00    | 0.13    | -0.27   |
| TGW2013 | 0.32*** | 0.27*   | 0.35**  | 0.34**  | 0.31**   | 0.49***  | 0.47***  | 0.38***  | 0.39***  | 0.46***  | 0.37***  | 0.36***  | -0.15    | -0.10    | -0.11   | -0.09    | 1.00    | 0.52*   | 0.33    | 0.45    |
| TGW2014 | 0.43*** | 0.47*** | 0.46*** | 0.41*** | 0.28*    | 0.48***  | 0.46***  | 0.37***  | 0.34**   | 0.60***  | 0.32**   | 0.28*    | -0.02    | 0.01     | -0.03   | -0.03    | 0.75*** | 1.00    | 0.78*** | 0.67**  |
| TGW2015 | 0.44*** | 0.46*** | 0.54*** | 0.48*** | 0.17     | 0.30**   | 0.37***  | 0.34**   | 0.23*    | 0.40***  | 0.40***  | 0.29**   | 0.12     | 0.14     | 0.08    | 0.04     | 0.72*** | 0.76*** | 1.00    | 0.37    |
| TGW2021 | 0.17    | 0.23*   | 0.21    | 0.30**  | 0.17     | 0.34**   | 0.44***  | 0.46***  | 0.27*    | 0.48***  | 0.32***  | 0.55***  | -0.02    | -0.04    | -0.16   | -0.17    | 0.65*** | 0.63*** | 0.68*** | 1.00    |

\*, \*\* and \*\*\* represent the coefficient is significant at the 0.05, 0.01 and 0.001 levels, respectively.
