# Supplementary material for: Genetic Diversity and Association Mapping of Grain-Size Traits in Rice Landraces from the Honghe Hani Rice Terraces System in Yunnan Province
Source: MDPI journal article supplement (doi:10.3390/plants12081678), 2023-04-17
Supplement: s1 [file s1]

**Table S1.** Genetic diversity parameters of 96 rice landraces collected from the Hani terraces based on 201 SSR markers.

| Locus  | Na | Ne    | I     | H     | PIC   | Locus   | Na | Ne    | I     | H     | PIC   |
|--------|----|-------|-------|-------|-------|---------|----|-------|-------|-------|-------|
| RM495  | 3  | 1.456 | 0.514 | 0.010 | 0.267 | RM190   | 3  | 2.442 | 0.965 | 0.125 | 0.505 |
| RM3740 | 3  | 1.910 | 0.766 | 0.063 | 0.458 | RM587   | 4  | 1.501 | 0.650 | 0.063 | 0.335 |
| RM476A | 4  | 2.435 | 1.087 | 0.385 | 0.650 | RM204   | 12 | 3.543 | 1.744 | 0.083 | 0.731 |
| RM84   | 6  | 3.640 | 1.439 | 0.094 | 0.738 | RM314   | 4  | 1.806 | 0.717 | 0.010 | 0.364 |
| RM1    | 7  | 5.352 | 1.792 | 0.083 | 0.805 | RM253   | 5  | 2.363 | 1.091 | 0.073 | 0.557 |
| RM283  | 3  | 1.975 | 0.711 | 0.031 | 0.377 | RM19660 | 9  | 6.086 | 1.926 | 0.146 | 0.834 |
| RM5496 | 8  | 5.986 | 1.879 | 0.083 | 0.819 | RM276   | 4  | 2.764 | 1.141 | 0.042 | 0.679 |
| RM583  | 6  | 4.342 | 1.587 | 0.063 | 0.739 | RM136   | 3  | 1.795 | 0.786 | 0.063 | 0.400 |
| RM23   | 8  | 4.901 | 1.738 | 0.135 | 0.772 | RM527   | 5  | 2.514 | 1.176 | 0.063 | 0.596 |
| RM312  | 6  | 3.243 | 1.380 | 0.760 | 0.727 | RM3     | 7  | 3.080 | 1.317 | 0.042 | 0.700 |
| RM449  | 2  | 1.491 | 0.511 | 0.010 | 0.372 | RM3827  | 3  | 1.333 | 0.492 | 0.031 | 0.233 |
| RM493  | 6  | 3.662 | 1.490 | 0.063 | 0.747 | RM8239  | 3  | 1.494 | 0.565 | 0.021 | 0.412 |
| RM9    | 4  | 2.685 | 1.170 | 0.021 | 0.590 | RM454   | 3  | 1.415 | 0.548 | 0.031 | 0.448 |
| RM5    | 5  | 3.426 | 1.375 | 0.052 | 0.701 | RM275   | 7  | 2.658 | 1.178 | 0.052 | 0.577 |
| RM488  | 5  | 3.103 | 1.268 | 0.031 | 0.660 | RM30    | 3  | 2.016 | 0.872 | 0.677 | 0.451 |
| RM237  | 4  | 2.535 | 1.038 | 0.031 | 0.656 | RM340   | 5  | 1.507 | 0.663 | 0.042 | 0.385 |
| RM246  | 5  | 3.135 | 1.263 | 0.125 | 0.633 | RM412   | 4  | 2.213 | 0.975 | 0.083 | 0.503 |
| RM6092 | 4  | 2.520 | 1.063 | 0.031 | 0.655 | RM427   | 4  | 2.179 | 0.959 | 0.010 | 0.498 |
| RM128  | 2  | 1.385 | 0.451 | 0.031 | 0.286 | RM481   | 12 | 3.729 | 1.806 | 0.865 | 0.752 |
| RM5501 | 6  | 3.212 | 1.354 | 0.260 | 0.711 | RM125   | 6  | 1.700 | 0.836 | 0.021 | 0.383 |
| RM297  | 11 | 3.302 | 1.684 | 0.823 | 0.712 | RM214   | 4  | 2.629 | 1.114 | 0.115 | 0.573 |
| RM5410 | 4  | 1.618 | 0.716 | 0.052 | 0.390 | RM542   | 6  | 2.752 | 1.239 | 0.115 | 0.589 |
| RM472  | 4  | 3.475 | 1.312 | 0.083 | 0.683 | RM432   | 3  | 2.166 | 0.861 | 0.104 | 0.494 |

|        |    |       |       |       |       |        |    |       |       |       |       |
|--------|----|-------|-------|-------|-------|--------|----|-------|-------|-------|-------|
| RM414  | 5  | 2.782 | 1.168 | 0.063 | 0.660 | RM346  | 5  | 2.861 | 1.146 | 0.094 | 0.618 |
| RM14   | 7  | 5.893 | 1.845 | 0.448 | 0.837 | RM336  | 7  | 3.972 | 1.523 | 0.156 | 0.706 |
| RM109  | 6  | 1.909 | 0.955 | 0.010 | 0.454 | RM455  | 2  | 1.510 | 0.521 | 0.021 | 0.326 |
| RM154  | 5  | 1.881 | 0.920 | 0.042 | 0.446 | RM505  | 3  | 2.292 | 0.901 | 0.802 | 0.583 |
| RM211  | 2  | 1.270 | 0.369 | 0.031 | 0.207 | RM234  | 6  | 3.013 | 1.290 | 0.104 | 0.678 |
| RM8    | 4  | 2.382 | 1.033 | 0.208 | 0.511 | RM478  | 3  | 2.880 | 1.077 | 0.083 | 0.588 |
| RM7636 | 4  | 2.648 | 1.090 | 0.042 | 0.569 | RM1335 | 5  | 3.279 | 1.340 | 0.052 | 0.711 |
| RM7288 | 13 | 4.244 | 1.858 | 0.177 | 0.768 | RM248  | 8  | 5.536 | 1.826 | 0.052 | 0.828 |
| RM452  | 2  | 1.957 | 0.682 | 0.010 | 0.533 | RM506  | 5  | 3.360 | 1.351 | 0.052 | 0.673 |
| RM550  | 3  | 2.435 | 0.959 | 0.031 | 0.535 | RM337  | 4  | 2.155 | 0.994 | 0.125 | 0.486 |
| RM4499 | 4  | 1.219 | 0.405 | 0.010 | 0.222 | RM407  | 4  | 3.494 | 1.309 | 0.083 | 0.661 |
| RM324  | 3  | 2.546 | 1.003 | 0.115 | 0.562 | RM152  | 5  | 2.416 | 1.036 | 0.885 | 0.588 |
| RM8254 | 8  | 4.426 | 1.681 | 0.865 | 0.765 | RM6863 | 3  | 2.418 | 0.983 | 0.083 | 0.618 |
| RM341  | 6  | 3.551 | 1.509 | 0.135 | 0.687 | RM4085 | 4  | 2.046 | 0.975 | 0.104 | 0.515 |
| RM475  | 4  | 1.734 | 0.829 | 0.042 | 0.407 | RM25   | 7  | 2.576 | 1.299 | 0.177 | 0.582 |
| RM6361 | 4  | 2.298 | 0.991 | 0.042 | 0.534 | RM126  | 2  | 1.686 | 0.597 | 0.021 | 0.340 |
| RM1385 | 5  | 1.349 | 0.582 | 0.000 | 0.319 | RM331  | 4  | 2.758 | 1.137 | 0.115 | 0.649 |
| RM263  | 6  | 5.017 | 1.688 | 0.115 | 0.786 | RM339  | 9  | 5.457 | 1.881 | 0.135 | 0.819 |
| RM526  | 3  | 1.970 | 0.857 | 0.302 | 0.517 | RM284  | 2  | 1.427 | 0.476 | 0.010 | 0.341 |
| RM221  | 2  | 1.471 | 0.500 | 0.083 | 0.354 | RM419  | 3  | 1.264 | 0.413 | 0.021 | 0.211 |
| RM318  | 3  | 1.733 | 0.696 | 0.042 | 0.371 | RM80   | 11 | 6.450 | 2.052 | 0.188 | 0.837 |
| RM6    | 4  | 2.332 | 1.047 | 0.052 | 0.568 | RM433  | 6  | 3.365 | 1.432 | 0.031 | 0.659 |
| RM240  | 7  | 2.082 | 1.042 | 0.073 | 0.471 | RM447  | 6  | 4.399 | 1.599 | 0.896 | 0.780 |
| RM425  | 2  | 1.362 | 0.436 | 0.021 | 0.247 | RM281  | 6  | 2.882 | 1.268 | 0.021 | 0.639 |
| RM250  | 2  | 1.448 | 0.488 | 0.010 | 0.423 | RM41   | 2  | 1.692 | 0.599 | 0.490 | 0.485 |
| RM208  | 3  | 1.937 | 0.719 | 0.063 | 0.456 | RM316  | 5  | 1.570 | 0.779 | 0.208 | 0.360 |

|        |    |       |       |       |       |        |   |       |       |       |       |
|--------|----|-------|-------|-------|-------|--------|---|-------|-------|-------|-------|
| RM138  | 3  | 1.615 | 0.693 | 0.021 | 0.360 | RM444  | 9 | 6.115 | 1.984 | 0.094 | 0.843 |
| RM60   | 3  | 1.301 | 0.426 | 0.052 | 0.225 | RM219  | 9 | 4.847 | 1.824 | 0.240 | 0.796 |
| RM523  | 2  | 1.371 | 0.442 | 0.010 | 0.234 | RM342  | 5 | 3.321 | 1.309 | 0.177 | 0.686 |
| RM175  | 5  | 2.599 | 1.129 | 0.938 | 0.539 | RM105  | 8 | 3.057 | 1.422 | 0.031 | 0.669 |
| RM545  | 6  | 3.852 | 1.522 | 0.042 | 0.716 | RM6854 | 3 | 1.824 | 0.767 | 0.021 | 0.391 |
| RM36   | 5  | 2.545 | 1.212 | 0.083 | 0.589 | RM553  | 5 | 2.917 | 1.237 | 0.083 | 0.636 |
| RM218  | 5  | 2.623 | 1.153 | 0.104 | 0.596 | RM278  | 5 | 3.482 | 1.377 | 0.052 | 0.679 |
| RM232  | 9  | 6.218 | 1.978 | 0.125 | 0.828 | RM201  | 4 | 2.169 | 1.027 | 0.052 | 0.532 |
| RM251  | 5  | 4.266 | 1.515 | 0.042 | 0.766 | OSR28  | 9 | 2.817 | 1.488 | 0.104 | 0.670 |
| RM563  | 4  | 2.559 | 1.092 | 0.010 | 0.586 | RM215  | 3 | 2.899 | 1.082 | 0.063 | 0.626 |
| RM282  | 5  | 2.664 | 1.202 | 0.010 | 0.582 | RM5095 | 9 | 6.677 | 2.043 | 0.052 | 0.854 |
| RM7097 | 5  | 2.659 | 1.253 | 0.063 | 0.588 | RM216  | 3 | 2.485 | 0.997 | 0.083 | 0.577 |
| RM156  | 4  | 3.442 | 1.290 | 0.823 | 0.677 | RM311  | 7 | 4.945 | 1.699 | 0.865 | 0.807 |
| RM16   | 5  | 2.129 | 1.068 | 0.010 | 0.537 | RM467  | 4 | 1.756 | 0.857 | 0.010 | 0.472 |
| RM319  | 3  | 1.740 | 0.762 | 0.000 | 0.412 | RM596  | 3 | 1.188 | 0.313 | 0.167 | 0.198 |
| RM203  | 2  | 1.800 | 0.637 | 0.563 | 0.428 | RM269  | 4 | 2.791 | 1.097 | 0.000 | 0.671 |
| RM168  | 6  | 1.725 | 0.912 | 0.042 | 0.401 | RM258  | 5 | 2.662 | 1.176 | 0.042 | 0.628 |
| RM293  | 2  | 1.994 | 0.692 | 0.073 | 0.456 | RM171  | 4 | 2.649 | 1.056 | 0.750 | 0.544 |
| RM114  | 3  | 2.142 | 0.907 | 0.646 | 0.586 | RM294  | 2 | 1.484 | 0.508 | 0.031 | 0.289 |
| RM514  | 3  | 2.071 | 0.871 | 0.094 | 0.550 | RM228  | 6 | 3.881 | 1.507 | 0.115 | 0.714 |
| RM570  | 6  | 3.567 | 1.453 | 0.104 | 0.676 | RM484  | 3 | 1.693 | 0.739 | 0.000 | 0.386 |
| RM85   | 3  | 1.641 | 0.698 | 0.031 | 0.364 | RM147  | 3 | 1.790 | 0.756 | 0.000 | 0.424 |
| RM307  | 5  | 3.629 | 1.403 | 0.156 | 0.750 | RM496  | 4 | 1.979 | 0.932 | 0.021 | 0.540 |
| RM551  | 7  | 3.399 | 1.461 | 0.052 | 0.669 | RM286  | 6 | 3.765 | 1.494 | 0.073 | 0.712 |
| RM335  | 10 | 5.727 | 1.990 | 0.698 | 0.834 | RM1208 | 4 | 3.256 | 1.232 | 0.135 | 0.692 |
| RM261  | 3  | 1.782 | 0.705 | 0.052 | 0.377 | RM7557 | 3 | 1.690 | 0.727 | 0.021 | 0.393 |

|        |   |       |       |       |       |         |       |       |       |       |       |
|--------|---|-------|-------|-------|-------|---------|-------|-------|-------|-------|-------|
| RM471  | 5 | 3.318 | 1.312 | 0.073 | 0.645 | RM6334  | 2     | 1.248 | 0.350 | 0.010 | 0.212 |
| RM564  | 5 | 2.681 | 1.168 | 0.010 | 0.605 | RM332   | 5     | 2.938 | 1.223 | 0.083 | 0.616 |
| RM1018 | 3 | 2.309 | 0.949 | 0.010 | 0.498 | RM167   | 3     | 1.972 | 0.858 | 0.094 | 0.455 |
| RM273  | 3 | 1.395 | 0.550 | 0.031 | 0.264 | RM479   | 2     | 1.977 | 0.687 | 0.000 | 0.429 |
| RM252  | 4 | 1.496 | 0.689 | 0.042 | 0.447 | RM202   | 4     | 1.629 | 0.748 | 0.021 | 0.381 |
| RM303  | 7 | 3.790 | 1.578 | 0.031 | 0.737 | RM287   | 5     | 3.463 | 1.359 | 0.104 | 0.668 |
| RM317  | 4 | 2.094 | 0.931 | 0.000 | 0.470 | RM209   | 3     | 1.857 | 0.769 | 0.010 | 0.433 |
| RM348  | 3 | 1.446 | 0.523 | 0.021 | 0.267 | RM229   | 5     | 2.152 | 1.109 | 0.083 | 0.529 |
| RM127  | 2 | 1.634 | 0.576 | 0.021 | 0.328 | RM21    | 7     | 3.104 | 1.501 | 0.156 | 0.701 |
| RM122  | 3 | 2.346 | 0.969 | 0.073 | 0.647 | RM206   | 9     | 6.727 | 2.040 | 0.094 | 0.857 |
| RM413  | 5 | 3.166 | 1.305 | 0.083 | 0.694 | RM224   | 4     | 2.771 | 1.135 | 0.063 | 0.635 |
| RM13   | 5 | 2.983 | 1.242 | 0.125 | 0.608 | RM144   | 5     | 3.534 | 1.427 | 0.219 | 0.748 |
| RM593  | 4 | 3.786 | 1.355 | 0.010 | 0.686 | RM20    | 6     | 3.127 | 1.346 | 0.708 | 0.713 |
| RM5994 | 3 | 2.359 | 0.934 | 1.000 | 0.486 | RM4     | 5     | 4.553 | 1.559 | 0.750 | 0.770 |
| RM169  | 4 | 3.659 | 1.339 | 0.094 | 0.710 | RM6288  | 3     | 1.939 | 0.763 | 0.042 | 0.393 |
| RM598  | 3 | 1.798 | 0.675 | 0.000 | 0.354 | RM19    | 6     | 2.980 | 1.198 | 0.042 | 0.654 |
| RM163  | 5 | 2.357 | 1.175 | 0.073 | 0.555 | RM6296  | 2     | 1.394 | 0.457 | 0.021 | 0.354 |
| RM459  | 3 | 1.413 | 0.491 | 0.010 | 0.362 | RM512   | 3     | 2.069 | 0.776 | 0.000 | 0.403 |
| RM161  | 3 | 1.297 | 0.454 | 0.000 | 0.245 | RM277   | 2     | 1.356 | 0.432 | 0.021 | 0.316 |
| RM305  | 2 | 1.371 | 0.442 | 0.010 | 0.234 | RM511   | 2     | 1.484 | 0.508 | 0.031 | 0.289 |
| RM7415 | 4 | 2.132 | 0.834 | 0.781 | 0.473 | RM519   | 5     | 3.643 | 1.442 | 0.052 | 0.712 |
| RM6313 | 2 | 1.358 | 0.433 | 0.021 | 0.229 | RM7102  | 7     | 3.711 | 1.514 | 0.563 | 0.745 |
| RM31   | 4 | 2.997 | 1.204 | 0.073 | 0.707 | RM309   | 3     | 2.566 | 1.018 | 0.052 | 0.631 |
| RM274  | 2 | 1.371 | 0.442 | 0.010 | 0.234 | RM235   | 8     | 4.520 | 1.698 | 0.604 | 0.792 |
| RM480  | 5 | 1.935 | 1.011 | 0.073 | 0.482 | RM17    | 4     | 2.959 | 1.228 | 0.135 | 0.631 |
| RM540  | 5 | 2.988 | 1.288 | 0.198 | 0.659 | Average | 4.657 | 2.714 | 1.077 | 0.145 | 0.553 |

Na: observed number of alleles; Ne: effective number of alleles; I: Shannon's information index; H: heterozygosity; PIC: polymorphism information content
