# Supplementary material for: Genetic Diversity and Association Mapping of Grain-Size Traits in Rice Landraces from the Honghe Hani Rice Terraces System in Yunnan Province
Source: MDPI journal article supplement (doi:10.3390/plants12081678), 2023-04-17
Supplement: s1 [file s1]

**Table S3.** Code, name and collecting place of 96 rice landraces from Honghe Hani rice terraces system.

| Code | Name              | Collecting place       | Code | Name           | Collecting place       |
|------|-------------------|------------------------|------|----------------|------------------------|
| 1    | Dumiaogu          | Shangxincheng Township | 49   | Maichou        | Eza Township           |
| 2    | Anxinggu          | Huangmaoling Township  | 50   | Nuogu          | Ganiang Township       |
| 3    | Rongrenche        | Niujiaozhai Township   | 51   | Honggu         | Ganiang Township       |
| 4    | Rongrenrenche     | Niujiaozhai Township   | 52   | Duominjiahelue | Eza Township           |
| 5    | Chemaouzheng      | Missing source         | 53   | zigu           | Missing source         |
| 6    | Honggunuo         | Shangxincheng Township | 54   | Pozhugu        | Missing source         |
| 7    | Bendidalixiang    | Shangxincheng Township | 55   | Chengke        | Missing source         |
| 8    | Heigunuo          | Shangxincheng Township | 56   | Chefu          | Xinjie Town            |
| 9    | Zimi              | Missing source         | 57   | Zimi           | Missing source         |
| 10   | Poluo             | Shangxincheng Township | 58   | Jiagu          | Missing source         |
| 11   | Gaoshanhonggu     | Shangxincheng Township | 59   | Chengni        | Missing source         |
| 12   | Luoge             | Niujiaozhai Township   | 60   | Laogenghongmi  | Huangcaoling Township  |
| 13   | Baijiaolaogeng    | Xinjie Town            | 61   | Dianmeng2      | Shalatuoxiang Township |
| 14   | Chemanche         | Niujiaozhai Township   | 62   | Shiouqian      | Huangcaoling Township  |
| 15   | Chena             | Missing source         | 63   | Chenilongge    | Huangcaoling Township  |
| 16   | Maoche            | Niujiaozhai Township   | 64   | Helingu        | Eza Township           |
| 17   | Bianhao3          | Xiaoxinjie Township    | 65   | Wupucheni      | Eza Township           |
| 18   | Laopinzhonghongmi | Panzhijia Township     | 66   | Apenpenche     | Huangcaoling Township  |
| 19   | Huagu             | Huangmaoling Township  | 67   | Kounihelue     | Huangcaoling Township  |
| 20   | Taiyanggu         | Shangxincheng Township | 68   | Hexi41         | Ganiang Township       |
| 21   | Yigu              | Xinjie Town            | 69   | Honggu         | Daping Township        |
| 22   | Longgenuo         | Shangxincheng Township | 70   | Haninuo        | Daping Township        |
| 23   | Chejiaojiaoer     | Missing source         | 71   | Zajiaonuogu1   | Shalatuoxiang Township |
| 24   | Poxinggu          | Xiaoxinjie Township    | 72   | Laowunuo       | Daping Township        |
| 25   | Bendihonggu1      | Missing source         | 73   | Zajiaonuogu2   | Missing source         |
| 26   | Gutianche         | Missing source         | 74   | Liuyuegu       | Xinjie Town            |
| 27   | Lvjiaogu          | Xinjie Town            | 75   | Zajiaonuogu3   | Shalatuoxiang Township |
| 28   | Bendihonggu2      | Shangxincheng Township | 76   | Laomujigu      | Shangxincheng Township |
| 29   | Luogei honglue    | Xinjie Town            | 77   | Hongnuogu      | Shalatuoxiang Township |

|    |                |                        |    |                  |                        |
|----|----------------|------------------------|----|------------------|------------------------|
| 30 | Laopinzhong    | Panzhihua Township     | 78 | Zajiaohonggu     | Shalatuoxiang Township |
| 31 | Pingcunnuogu   | Shangxincheng Township | 79 | Gangu            | Daping Township        |
| 32 | Dalonggu       | Eza Township           | 80 | Shuihandao       | Huangmaoling Township  |
| 33 | Longshanlinggu | Xinjie Town            | 81 | laopinzhongbaigu | Shalatuoxiang Township |
| 34 | Yaduogu        | Xinjie Town            | 82 | Yaorengu         | Daping Township        |
| 35 | Chenu          | Shengcun Township      | 83 | Honggu           | Daping Township        |
| 36 | Qixing         | Shangxincheng Township | 84 | Wopuchezuo       | Xinjie Town            |
| 37 | Jjianshui      | Xinjie Town            | 85 | Zhenzhumigu      | Shangxincheng Township |
| 38 | Huaaigu        | Xinjie Town            | 86 | Baipinuo         | Xinjie Town            |
| 39 | Huagu          | Shengcun Township      | 87 | Bianhao6         | Xiaoxinjie Township    |
| 40 | Lengshuigu     | Daping Township        | 88 | Baimi            | Panzhihua Township     |
| 41 | Chena          | Xinjie Town            | 89 | Zinuo            | Missing source         |
| 42 | Gaoshan honggu | Missing source         | 90 | Cheran           | Xinjie Town            |
| 43 | Maoche         | Xinjie Town            | 91 | Manchehonglue    | Xinjie Town            |
| 44 | Honggunuo      | Missing source         | 92 | Chejiagu         | Xinjie Town            |
| 45 | Laogengnuo     | Missing source         | 93 | Hongpinuo        | Missing source         |
| 46 | Aizheranche    | Xinjie Town            | 94 | Huangpinuo       | Xinjie Town            |
| 47 | Cesuogu        | Daping Township        | 95 | Yuelianggu       | Xinjie Town            |
| 48 | Kenunuxiang    | Eza Township           | 96 | Baigu            | Shengcun Township      |
