# Supplementary material for: Genetic Diversity and Association Mapping of Grain-Size Traits in Rice Landraces from the Honghe Hani Rice Terraces System in Yunnan Province
Source: MDPI journal article supplement (doi:10.3390/plants12081678), 2023-04-17
Supplement: s1 [file s1]

**Table S4.** Chromosome information of 201 pairs of SSR markers.

| Primer name | Chromosome | Primer name | Chromosome | Primer name | Chromosome |
|-------------|------------|-------------|------------|-------------|------------|
| RM495       | 1          | RM114       | 3          | RM407       | 8          |
| RM3740      | 1          | RM514       | 3          | RM152       | 8          |
| RM476A      | 1          | RM570       | 3          | RM6863      | 8          |
| RM84        | 1          | RM85        | 3          | RM4085      | 8          |
| RM1         | 1          | RM307       | 4          | RM25        | 8          |
| RM283       | 1          | RM551       | 4          | RM126       | 8          |
| RM5496      | 1          | RM335       | 4          | RM331       | 8          |
| RM583       | 1          | RM261       | 4          | RM339       | 8          |
| RM23        | 1          | RM471       | 4          | RM284       | 8          |
| RM312       | 1          | RM564       | 4          | RM419       | 8          |
| RM449       | 1          | RM1018      | 4          | RM80        | 8          |
| RM493       | 1          | RM273       | 4          | RM433       | 8          |
| RM9         | 1          | RM252       | 4          | RM447       | 8          |
| RM5         | 1          | RM303       | 4          | RM281       | 8          |
| RM488       | 1          | RM317       | 4          | RM41        | 9          |
| RM237       | 1          | RM348       | 4          | RM316       | 9          |
| RM246       | 1          | RM127       | 4          | RM444       | 9          |
| RM6092      | 1          | RM122       | 5          | RM219       | 9          |
| RM128       | 1          | RM413       | 5          | RM342       | 9          |
| RM5501      | 1          | RM13        | 5          | RM105       | 9          |
| RM297       | 1          | RM593       | 5          | RM6854      | 9          |
| RM5410      | 1          | RM5994      | 5          | RM553       | 9          |
| RM472       | 1          | RM169       | 5          | RM278       | 9          |
| RM414       | 1          | RM598       | 5          | RM201       | 9          |
| RM14        | 1          | RM163       | 5          | OSR28       | 9          |
| RM109       | 2          | RM459       | 5          | RM215       | 9          |
| RM154       | 2          | RM161       | 5          | RM5095      | 10         |
| RM211       | 2          | RM305       | 5          | RM216       | 10         |
| RM8         | 2          | RM7415      | 5          | RM311       | 10         |
| RM7636      | 2          | RM6313      | 5          | RM467       | 10         |
| RM7288      | 2          | RM31        | 5          | RM596       | 10         |
| RM452       | 2          | RM274       | 5          | RM269       | 10         |
| RM550       | 2          | RM480       | 5          | RM258       | 10         |
| RM4499      | 2          | RM540       | 6          | RM171       | 10         |
| RM324       | 2          | RM190       | 6          | RM294       | 10         |
| RM8254      | 2          | RM587       | 6          | RM228       | 10         |
| RM341       | 2          | RM204       | 6          | RM484       | 10         |
| RM475       | 2          | RM314       | 6          | RM147       | 10         |
| RM6361      | 2          | RM253       | 6          | RM496       | 10         |
| RM1385      | 2          | RM19660     | 6          | RM286       | 11         |
| RM263       | 2          | RM276       | 6          | RM1208      | 11         |

|        |   |        |   |        |    |
|--------|---|--------|---|--------|----|
| RM526  | 2 | RM136  | 6 | RM7557 | 11 |
| RM221  | 2 | RM527  | 6 | RM6334 | 11 |
| RM318  | 2 | RM3    | 6 | RM332  | 11 |
| RM6    | 2 | RM3827 | 6 | RM167  | 11 |
| RM240  | 2 | RM8239 | 6 | RM479  | 11 |
| RM425  | 2 | RM454  | 6 | RM202  | 11 |
| RM250  | 2 | RM275  | 6 | RM287  | 11 |
| RM208  | 2 | RM30   | 6 | RM209  | 11 |
| RM138  | 2 | RM340  | 6 | RM229  | 11 |
| RM60   | 3 | RM412  | 6 | RM21   | 11 |
| RM523  | 3 | RM427  | 7 | RM206  | 11 |
| RM175  | 3 | RM481  | 7 | RM224  | 11 |
| RM545  | 3 | RM125  | 7 | RM144  | 11 |
| RM36   | 3 | RM214  | 7 | RM20   | 12 |
| RM218  | 3 | RM542  | 7 | RM4    | 12 |
| RM232  | 3 | RM432  | 7 | RM6288 | 12 |
| RM251  | 3 | RM346  | 7 | RM19   | 12 |
| RM563  | 3 | RM336  | 7 | RM6296 | 12 |
| RM282  | 3 | RM455  | 7 | RM512  | 12 |
| RM7097 | 3 | RM505  | 7 | RM277  | 12 |
| RM156  | 3 | RM234  | 7 | RM511  | 12 |
| RM16   | 3 | RM478  | 7 | RM519  | 12 |
| RM319  | 3 | RM1335 | 7 | RM7102 | 12 |
| RM203  | 3 | RM248  | 7 | RM309  | 12 |
| RM168  | 3 | RM506  | 8 | RM235  | 12 |
| RM293  | 3 | RM337  | 8 | RM17   | 12 |

---
